# Supplementary material for: Underwater CAM photosynthesis elucidated by Isoetes genome
Source: PubMed Central journal article supplement (PMC8566536; doi:10.1038/s41467-021-26644-7), 2021-11-03
Supplement: 41467_2021_26644_MOESM3_ESM.pdf [file 41467_2021_26644_MOESM3_ESM.pdf]

## Description of Additional Supplementary Files

1  
2  
3  
4  
5  
6  
7  
8  
9  
10  
11  
12  
13  
14  
15  
16  
17  
18  
19  
20  
21  
22  
23  
24  
25  
26  
27

File Name: Supplementary Data 1

Description: Characterization and quantification of repetitive sequences in the *Isoetes taiwanensis* genome.

File Name: Supplementary Data 2

Description: TPM normalized gene expression values used to generate TOD expression plots for *Isoetes taiwanensis*. Columns are labeled with time of expression followed by replicate number.

File Name: Supplementary Data 3

Description: Locus IDs from multi-species comparisons of TOD specific gene expression.

File Name: Supplementary Data 4

Description: GO term enrichment for genes in *Isoetes taiwanensis* clustered according to TOD expression.

File Name: Supplementary Data 5

Description: Putative novel cis-regulatory elements (CREs) identified in *Isoetes taiwanensis*. While half of the CREs identified by ELEMENT analysis closely matched known transcription factor binding sites in *Arabidopsis*, many remained unclassified. P-values calculated in TOMTOM.

File Name: Supplementary Data 6

Description: Few known circadian motifs are found upstream of CAM genes with TOD expression in *Isoetes taiwanensis*. P-value and Q-value calculated in FIMO.
